# Supplementary material for: Large Scale Production and Downstream Processing of Labyrinthopeptins from the Actinobacterium Actinomadura namibiensis
Source: MDPI journal article supplement (doi:10.3390/bioengineering5020042), 2018-06-05
Supplement: s1 [file s1]

## 1. Preparative HPLC data

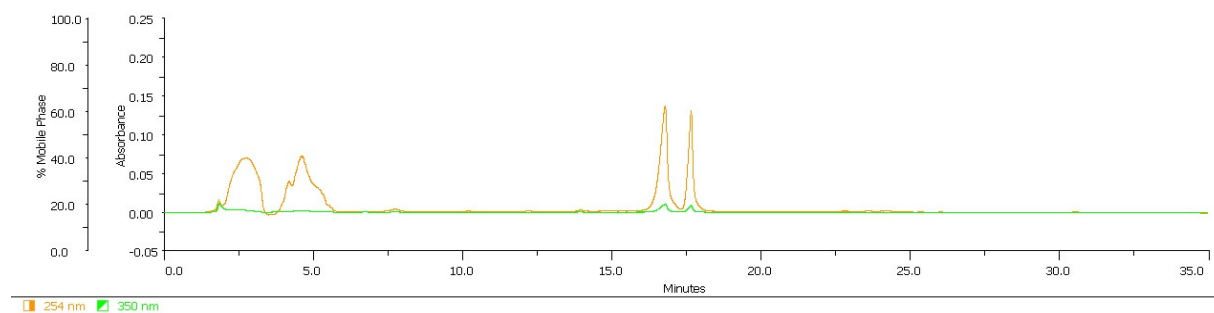

**Figure S1.** HPLC chromatogram showing the preparative HPLC separation of labyrinthopeptin A1(**1**) and labyrinthopeptin A2 (**2**) (UV 254 nm and UV 350 nm)

## 2. UHR-MS data

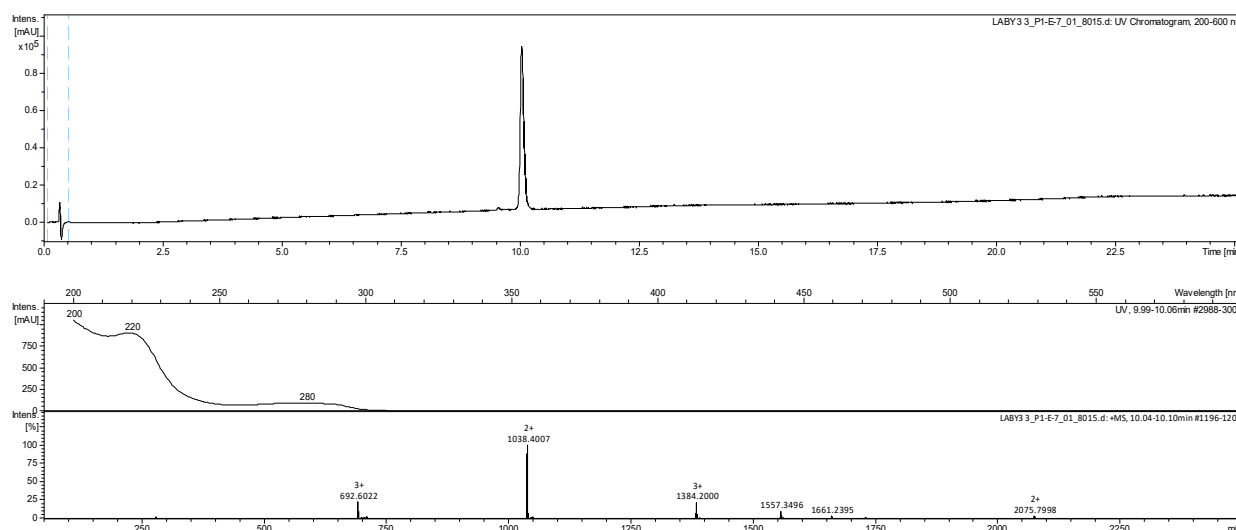

**Figure S2.** HPLC-UV/Vis chromatogram (200–600 nm) and HRMS data of **1**

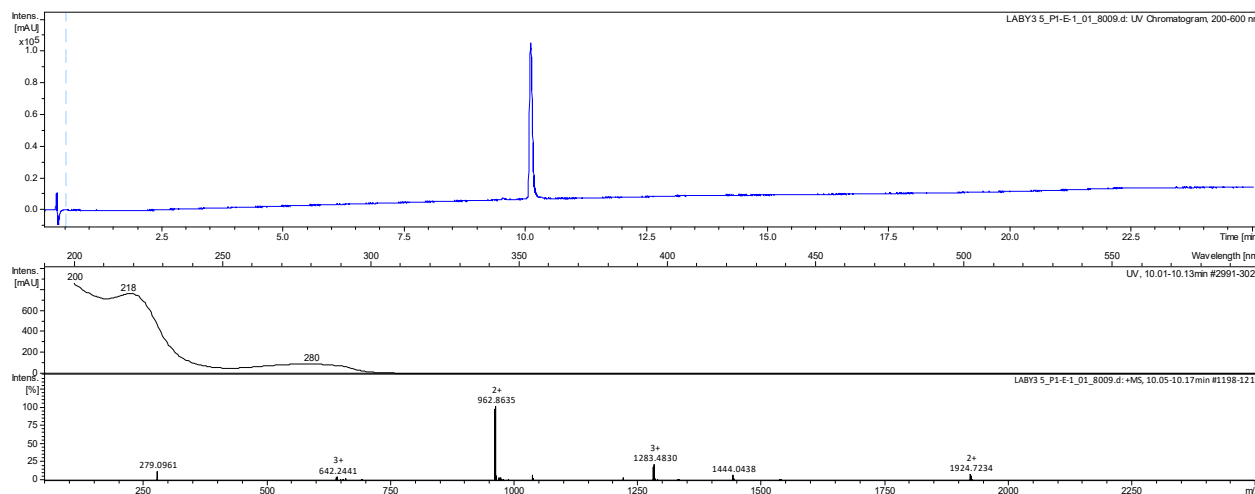

**Figure S3.** HPLC-UV/Vis chromatogram (200–600 nm) and HRMS data of **2**

### 3. HPLC data for the purity

The purity of the final samples was measured using a HPLC Agilent 1200 Series instrument (Agilent, Santa Clara, CA, USA), equipped with degasser, binary Pump SL (Agilent Technologies 1260 Infinity), autosampler and DAD/electron light scattering detector Corona Ultra RS (Dionex, Sunnyvale, CA, USA). Acquity UPLC BEH C18 column (2.1 x 50 mm, 1.7  $\mu$ m) from Waters (Eschborn, Germany) was used as a stationary phase while the mobile phase consisted of: solvent A- H<sub>2</sub>O + 0.1% formic acid (FA), solvent B- acetonitrile (ACN + 0.1% FA). A gradient was run from 5% B for 5 min, followed by a linear increase to 100% B over 25 min, and thereafter maintained under isocratic conditions at 100% for 5 min; flow rate 0.6 mL/min, injection volume 2  $\mu$ L, UV detection at 220 nm.

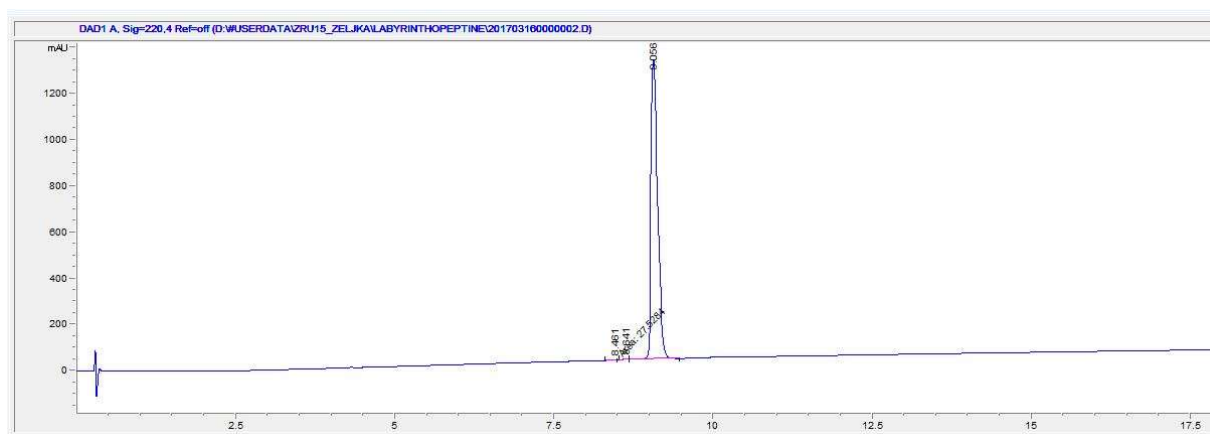

**Figure S4.** HPLC-UV chromatogram (220 nm) of **1** showing the purity

Signal 2: DAD1 A, Sig=220,4 Ref=off

| Peak # | RetTime [min] | Type | Width [min] | Area [mAU*s] | Area %  |
|--------|---------------|------|-------------|--------------|---------|
| 1      | 8.461         | MM   | 0.1005      | 27.52843     | 0.2930  |
| 2      | 8.641         | VV   | 0.0845      | 29.31231     | 0.3120  |
| 3      | 9.056         | VB   | 0.1080      | 9338.78809   | 99.3950 |
| 4      | 12.024        |      | 0.0000      | 0.00000      | 0.0000  |

Totals : 9395.62882

**Figure S5.** Excerpt from the original purity report of **1** (peak 3); purity expressed as area %

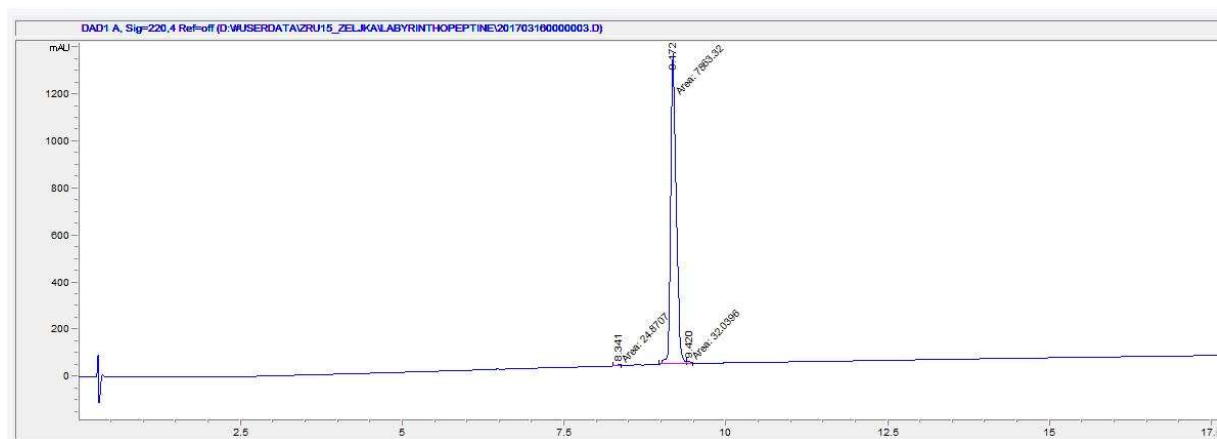

**Figure S6.** HPLC-UV chromatogram (220 nm) of **2** showing the final purity

Signal 2: DAD1 A, Sig=220,4 Ref=off

| Peak<br># | RetTime<br>[min] | Type | Width<br>[min] | Area<br>[mAU*s] | Area<br>% |
|-----------|------------------|------|----------------|-----------------|-----------|
| 1         | 8.341            | MM   | 0.0691         | 24.87069        | 0.3140    |
| 2         | 9.172            | MM   | 0.0992         | 7863.32275      | 99.2815   |
| 3         | 9.420            | MM   | 0.0642         | 32.03956        | 0.4045    |
| 4         | 12.024           |      | 0.0000         | 0.00000         | 0.0000    |

Totals : 7920.23300

**Figure S7.** Excerpt from the original purity report of **2** (peak 2); purity expressed as area %
